# Supplementary material
Source: PubMed Central journal article supplement (PMC4468718)
Supplement: AAC.00181-15_zac007154095so1.pdf [file AAC.00181-15_zac007154095so1.pdf]

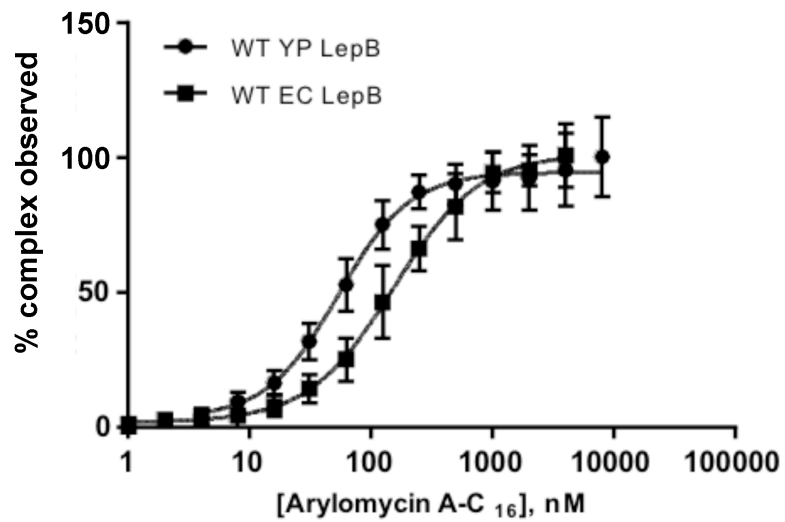

**Supplemental Figure 1.** Equilibrium binding curves for wild-type *Y. pestis* and *E. coli* LepB. Error bars are  $\pm$  SD. The calculated  $K_D$  values are  $31 \pm 14$  nM (*Y. pestis*) and  $62 \pm 24$  nM (*E. coli*).
